# Supplementary material for: Gain of 20q11.21 in Human Pluripotent Stem Cells Impairs TGF-β-Dependent Neuroectodermal Commitment
Source: PubMed Central journal article supplement — Stem Cell Reports. 2019 Jun 6;13(1):163–76. doi: 10.1016/j.stemcr.2019.05.005 (PMC6627003; doi:10.1016/j.stemcr.2019.05.005), 2019-06-06
Supplement: mmc1.pdf [file mmc1.pdf]

**Stem Cell Reports, Volume 13**

**Supplemental Information**

**Gain of 20q11.21 in Human Pluripotent Stem Cells Impairs TGF- $\beta$ -Dependent Neuroectodermal Commitment**

**C. Markouli, E. Couvreur De Deckersberg, M. Regin, H.T. Nguyen, F. Zambelli, A. Keller, D. Dziejzicka, J. De Kock, L. Tilleman, F. Van Nieuwerburgh, L. Franceschini, K. Sermon, M. Geens, and C. Spits**

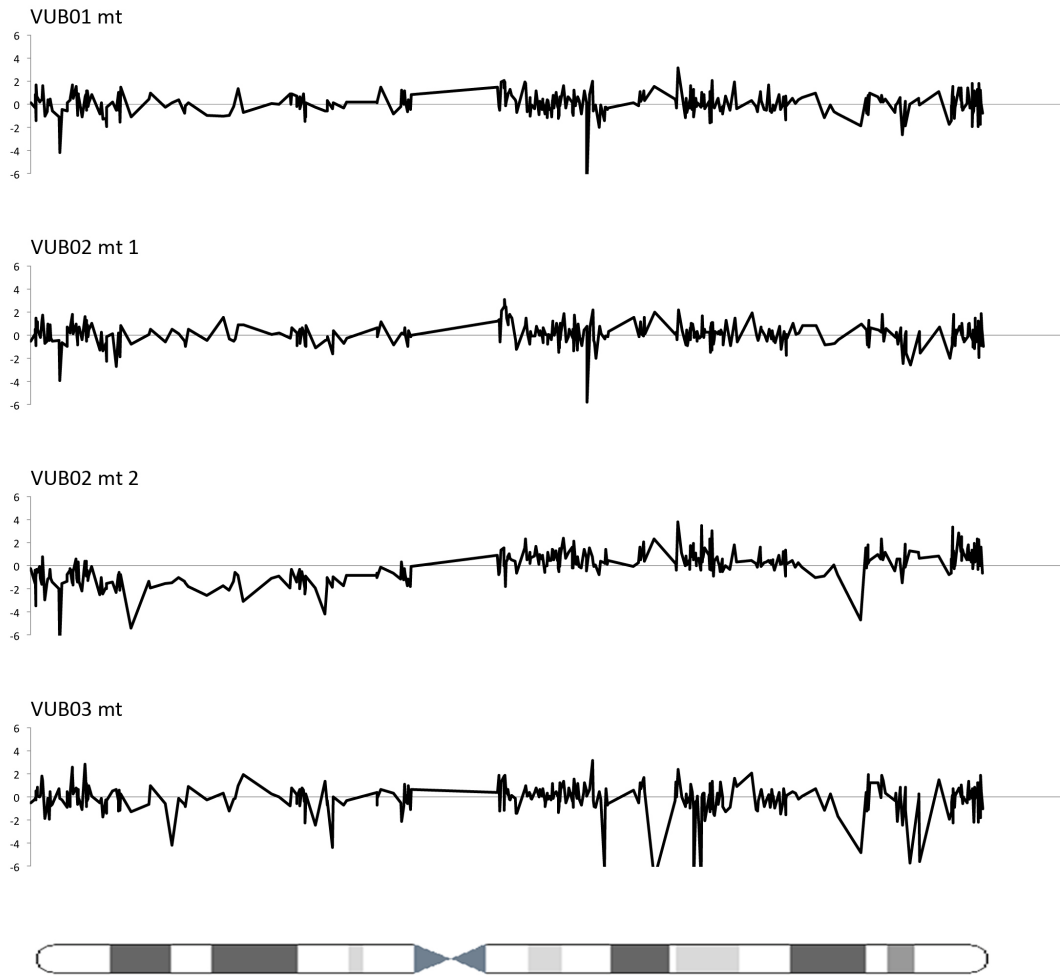

**Figure S1 (relates to figure 1 in the main text).** Raw gene expression data of all genes expressed on chromosome 20, for the four lines carrying a gain of 20q11.21. Each plot represents the differential gene expression for that line against the whole group of control lines. Data plotted as a Log<sub>2</sub> Fold Change.

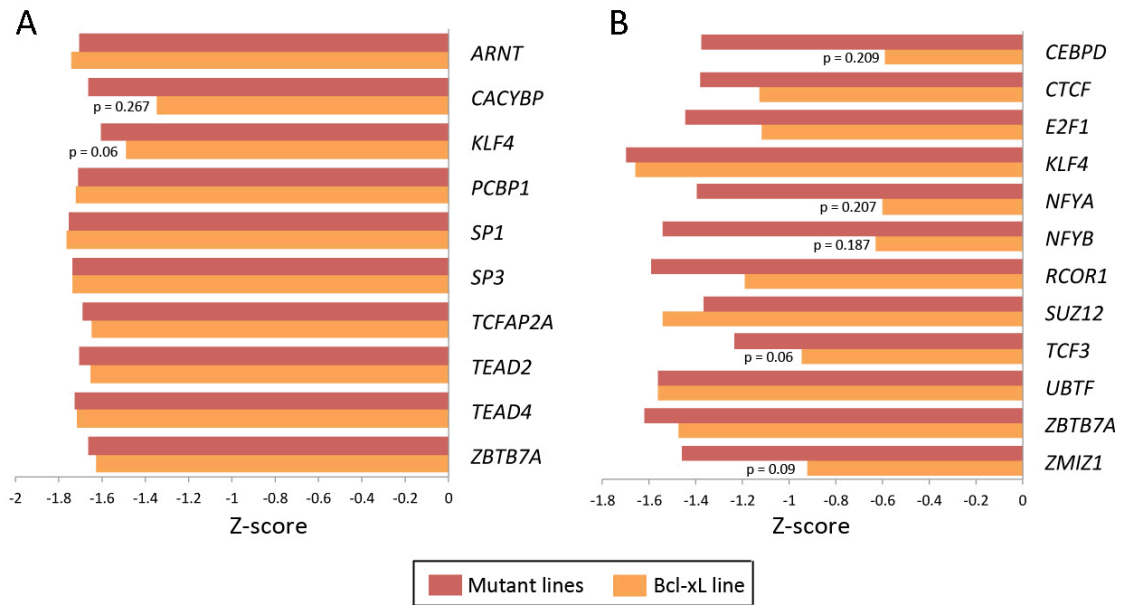

**Figure S2 (relates to figure 2 in the main text).** Supplementary Figure 2A shows an *in silico* prediction of the differentially activated transcription factors, based on the binding motifs identified at the promoter region of each gene that is differentially expressed between wt vs mt or wt vs VUB03\_Bcl-xL (with a  $|\log_2$  Fold Change $>1$  and FDR $<0.05$ ). The prediction was done using the TRANSFAC and JASPAR databases in Enrichr (Chen et al., 2013; Kuleshov et al., 2016). The plot shows the Z-scores for the transcription factors. All results are statistically significant with a p-value $<0.05$  unless the value is specified. Supplementary figure 2B shows the results of the analysis using ENCODE and ChEA consensus, which searches for transcription binding models based on the ENCODE project and already published CHIP-seq data. The plot shows the Z-score for the transcription factors predicted to be differentially activated. All results are statistically significant with a p-value $<0.05$ , unless otherwise indicated.

A

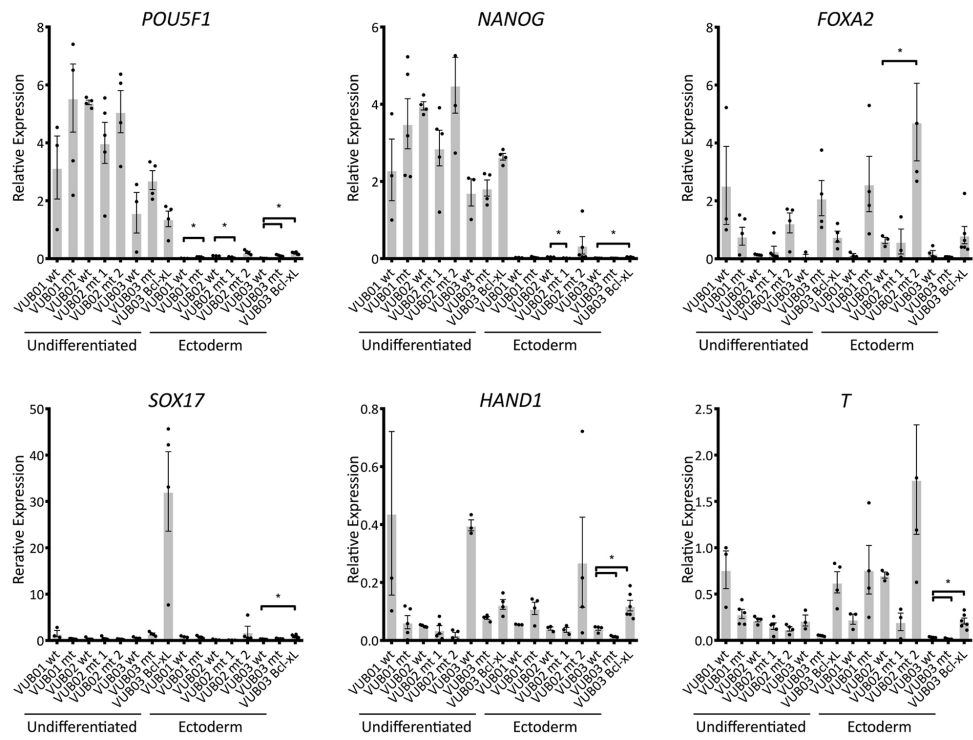

B

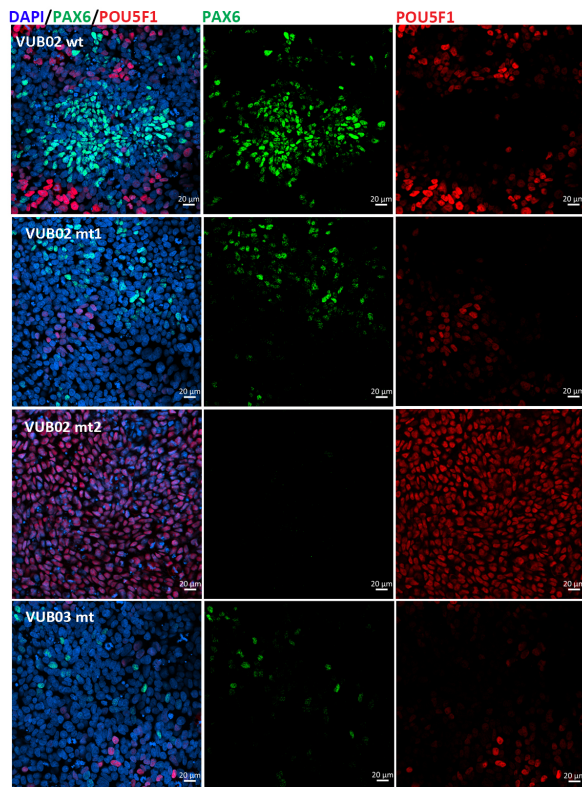

C

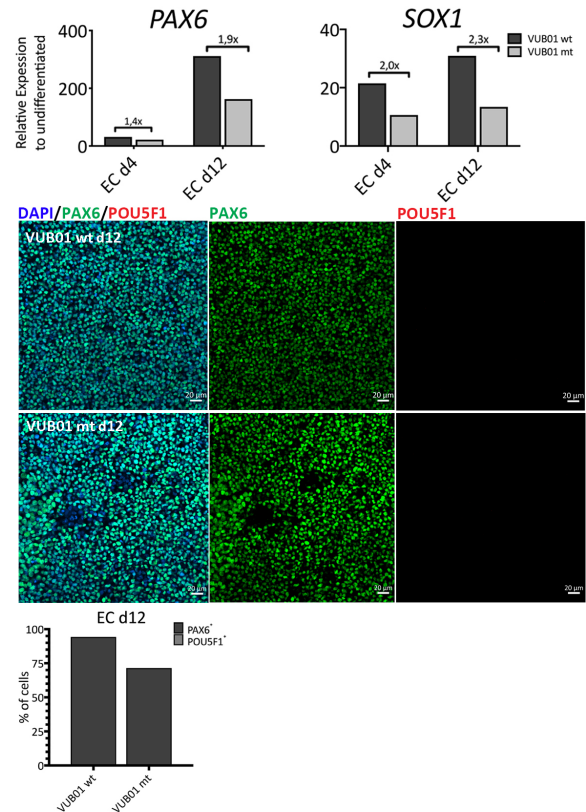

**Figure S3 (relates to figure 3 in the main text).** Figure S3A shows relative mRNA expression as measured by qPCR for *POU5F1*, *NANOG*, *FOXA2*, *SOX17*, *HAND1* and *T* after 4 days of neuroectoderm differentiation (n=3 to 5). Data are shown as mean ± SEM, each dot represents an independent differentiation experiment and the horizontal bars with asterisks represent statistical significance between samples (P < 0.05, t-test).



Figure S3B shows examples of immunostaining for PAX6 (green) and POU5F1 (red) in the lines not shown in figure 3 of the main text (VUB02\_wt, VUB02\_mt1 and VUB02\_mt2, VUB03\_mt), after 4 days of neuroectoderm differentiation. Figure 3SC shows the results of a 12-day neuroectoderm differentiation. The top panel shows the relative mRNA expression as measured by qPCR for *PAX6* and *SOX1* in VUB01\_wt and VUB01\_mt after 12 days of differentiation, and as compared to a 4-days differentiation. Under, are examples of immunostaining for PAX6 (green) and POU5F1 (red) in VUB01\_wt and VUB01\_mt after 12 days of neuroectoderm differentiation. The lower panel shows a plot with the percentages of PAX6 and POU5F1-positive cells in VUB01\_wt and VUB01\_mt after 12 days of neuroectoderm differentiation (n=1).

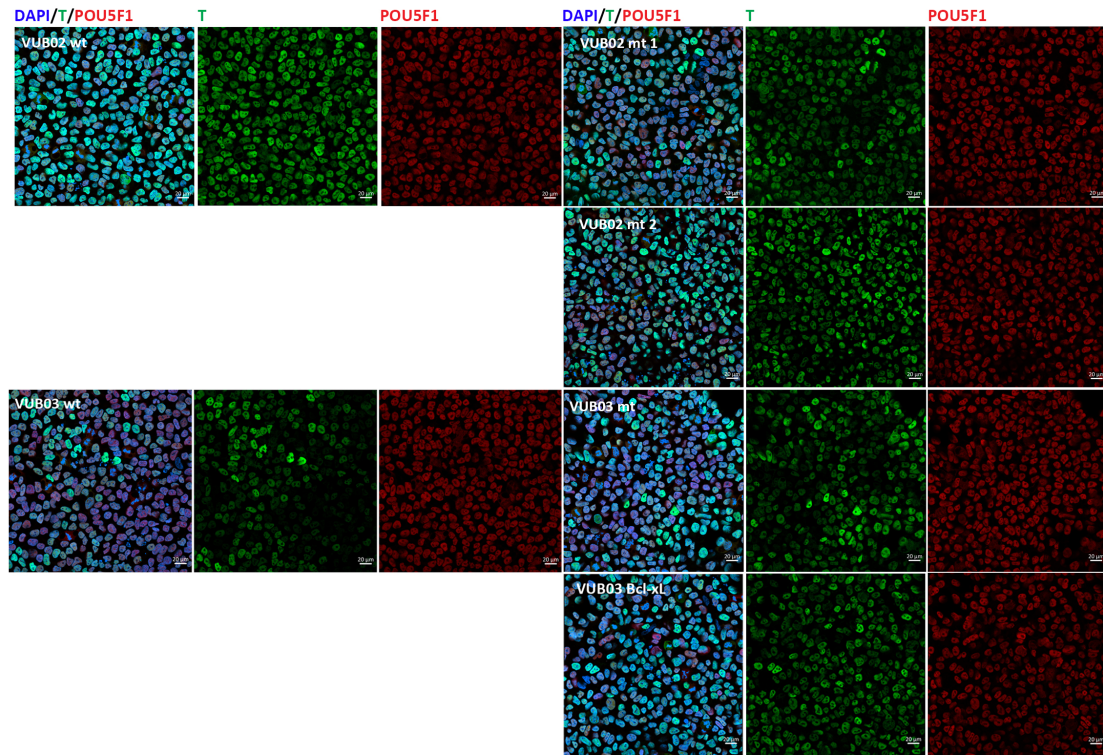

**Figure S4, relates to figure 4 in main text.** Immunostaining for T (green) and POU5F1 (red) after 24h mesendoderm induction for the lines not shown in figure 4A (VUB02\_wt, VUB02\_mt1 and VUB02\_mt2, VUB03\_wt versus VUB03\_mt and VUB03\_Bcl-xL).

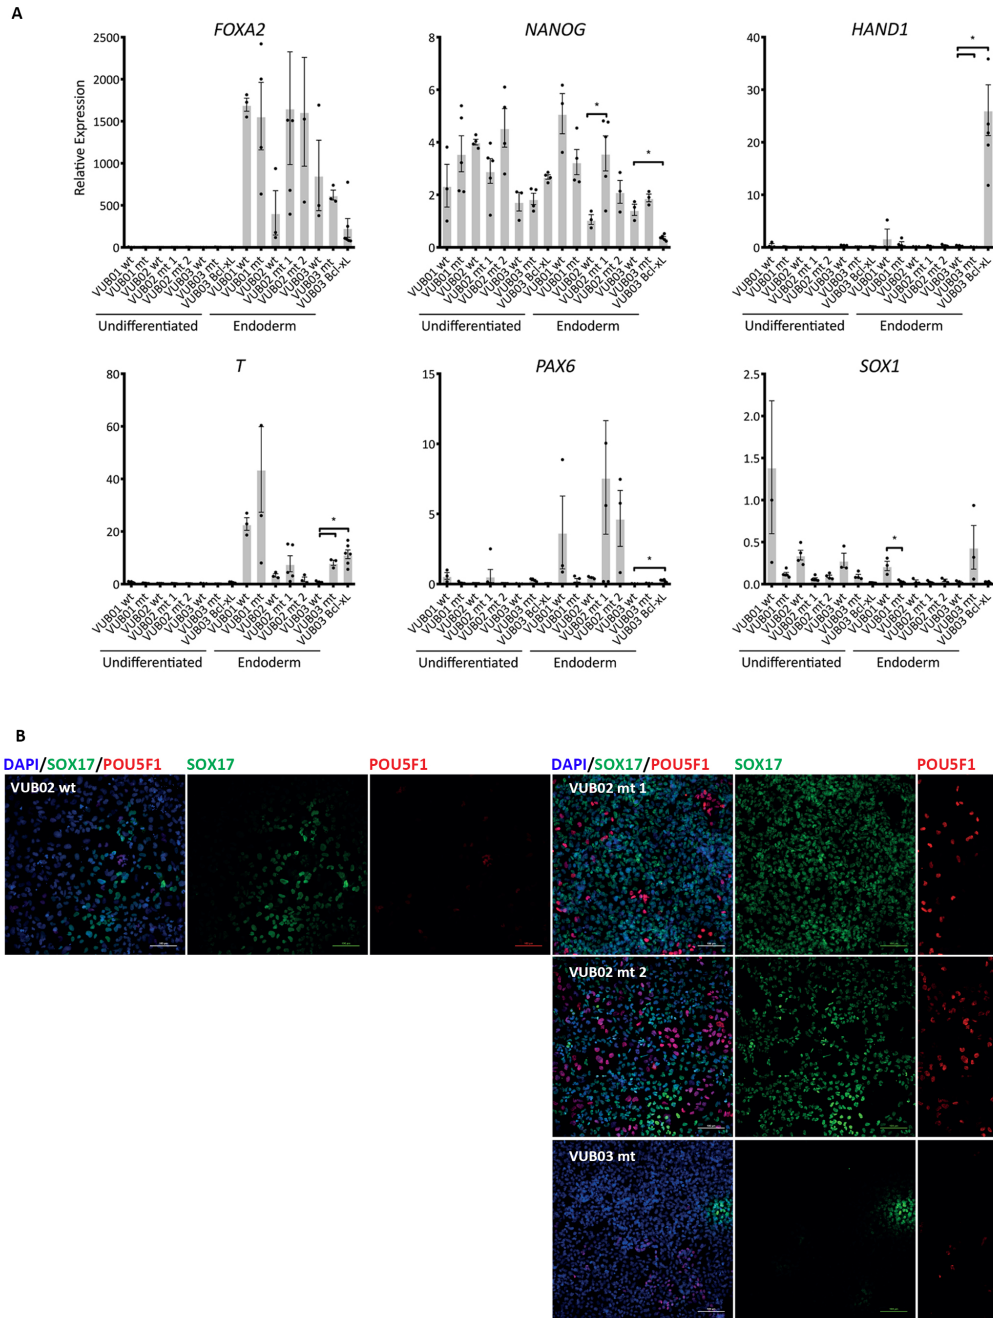

**Figure S5 (relates to figure 4 in the main text).** Figure S5A shows relative mRNA expression as measured by qPCR for *FOXA2*, *NANOG*, *HAND1*, *T*, *PAX6* and *SOX1* after definitive endoderm differentiation for all the lines (n=3 to 5). Data are shown as mean  $\pm$ SEM, each dot represents an independent differentiation experiment and the horizontal bars with asterisks represent statistical significance between samples ( $P < 0.05$ , t-test). Figure S5B shows immunostaining for SOX17 (green) and POU5F1 (red) after definitive endoderm differentiation in lines not shown in Figure 4 (VUB02\_wt, VUB02\_mt1, VUB02\_mt2 and VUB03\_mt).

**Table S1. List of lines and sublines used in the study, passage range and details on the genetic content of the lines**

| Line         | Passage range | Karyotype               | Breakpoints (size)                                              |
|--------------|---------------|-------------------------|-----------------------------------------------------------------|
| VUB01        | 75-89         | 46, XY                  |                                                                 |
| VUB01_mt     | 289-303       | 46, XY,dup(20)(q11.21)  | 20: 31300536 – 35306783 (3.9Mb)                                 |
| VUB02        | 15            | 46, XY                  |                                                                 |
| VUB02_mt1    | 377-383       | 46, XY,dup(20)(q11.21)  | 20: 31300536 – 32533536 (1.2Mb)                                 |
| VUB02_mt2    | 19-25         | 46, XY,i(20)(p11.1)     | 20: 90359 – 26095364 (26Mb)<br>20: 26108364 – 64262203 (36.3Mb) |
| VUB03        | 23-29         | 46, XX                  |                                                                 |
| VUB03_mt     | 207-209       | 46, XX,dup(20)(q11.21)  | 20: 31300536 – 32212536 (0.9Mb)                                 |
| VUB03_Bcl-xL | 106-109       | 46, XX,dup(1)(q32.1q41) | 1: 19705020 – 21919120 (22.1Mb)                                 |
| VUB14        | 22-25         | 46, XX                  |                                                                 |

**Table S2. Gene set enrichment analysis for the C2 library**

| NAME                                       | SIZE | NES    | FDR q-val |
|--------------------------------------------|------|--------|-----------|
| SHEN SMARCA2 TARGETS UP                    | 413  | -2.706 | 0.00      |
| OUELLET OVARIAN CANCER INVASIVE VS LMP UP  | 113  | -2.565 | 0.00      |
| MILI PSEUDOPODIA HAPTOTAXIS UP             | 476  | -2.508 | 0.00      |
| SEIDEN ONCOGENESIS BY MET                  | 82   | -2.441 | 0.00      |
| SENGUPTA NASOPHARYNGEAL CARCINOMA UP       | 254  | -2.400 | 0.00      |
| JOHNSTONE PARVB TARGETS 2 DN               | 309  | -2.370 | 0.00      |
| ZHANG BREAST CANCER PROGENITORS UP         | 394  | -2.369 | 0.00      |
| KAMMINGA EZH2 TARGETS                      | 40   | -2.333 | 0.00      |
| DING LUNG CANCER EXPRESSION BY COPY NUMBER | 96   | -2.252 | 0.00      |
| BIDUS METASTASIS UP                        | 203  | -2.230 | 0.00      |
| DE YY1 TARGETS DN                          | 88   | -2.189 | 0.00      |
| DAZARD RESPONSE TO UV SCC UP               | 106  | -2.182 | 0.00      |
| BORCZUK MALIGNANT MESOTHELIOMA UP          | 288  | -2.130 | 0.00      |
| ABRAMSON INTERACT WITH AIRE                | 42   | -2.126 | 0.00      |
| MALONEY RESPONSE TO 17AAG DN               | 77   | -2.124 | 0.00      |

|                                                     |     |        |      |
|-----------------------------------------------------|-----|--------|------|
| CHIANG LIVER CANCER SUBCLASS UNANNOTATED DN         | 178 | -2.114 | 0.00 |
| RHEIN ALL GLUCOCORTICOID THERAPY DN                 | 342 | -2.107 | 0.00 |
| GENTILE UV RESPONSE CLUSTER D4                      | 54  | -2.104 | 0.00 |
| FISCHER G2 M CELL CYCLE                             | 216 | -2.101 | 0.00 |
| SAKAI TUMOR INFILTRATING MONOCYTES DN               | 73  | -2.100 | 0.00 |
| SCHLOSSER MYC TARGETS REPRESSED BY SERUM            | 153 | -2.099 | 0.00 |
| MARTINEZ RESPONSE TO TRABECTEDIN DN                 | 264 | -2.098 | 0.00 |
| IKEDA MIR30 TARGETS UP                              | 111 | -2.096 | 0.00 |
| JAATINEN HEMATOPOIETIC STEM CELL UP                 | 267 | -2.095 | 0.00 |
| DACOSTA UV RESPONSE VIA ERCC3 COMMON DN             | 463 | -2.087 | 0.00 |
| PYEON CANCER HEAD AND NECK VS CERVICAL UP           | 162 | -2.068 | 0.00 |
| ENK UV RESPONSE KERATINOCYTE DN                     | 471 | -2.041 | 0.00 |
| GABRIELY MIR21 TARGETS                              | 269 | -2.038 | 0.00 |
| RAMALHO STEMNESS UP                                 | 197 | -2.036 | 0.00 |
| WINNEPENNINCKX MELANOMA METASTASIS UP               | 149 | -2.036 | 0.00 |
| KENNY CTNNB1 TARGETS UP                             | 41  | -2.035 | 0.00 |
| GARY CD5 TARGETS DN                                 | 394 | -2.028 | 0.00 |
| WAMUNYOKOLI OVARIAN CANCER LMP DN                   | 176 | -2.019 | 0.00 |
| ONDER CDH1 TARGETS 1 DN                             | 138 | -2.017 | 0.00 |
| IKEDA MIR1 TARGETS UP                               | 52  | -2.011 | 0.00 |
| CHEOK RESPONSE TO HD MTX DN                         | 23  | -2.007 | 0.00 |
| SPIRA SMOKERS LUNG CANCER UP                        | 31  | -2.006 | 0.00 |
| HAHTOLA MYCOSIS FUNGOIDES CD4 DN                    | 108 | -2.005 | 0.00 |
| LI WILMS TUMOR VS FETAL KIDNEY 2 UP                 | 24  | -2.000 | 0.00 |
| NIKOLSKY BREAST CANCER 8Q12 Q22 AMPLICON            | 105 | -1.986 | 0.00 |
| DEBIASI APOPTOSIS BY REOVIRUS INFECTION UP          | 285 | -1.984 | 0.00 |
| YU MYC TARGETS UP                                   | 39  | -1.980 | 0.00 |
| WELCSH BRCA1 TARGETS UP                             | 186 | -1.978 | 0.00 |
| FEVR CTNNB1 TARGETS DN                              | 499 | -1.978 | 0.00 |
| GENTILE UV HIGH DOSE DN                             | 290 | -1.975 | 0.00 |
| FLECHNER BIOPSY KIDNEY TRANSPLANT REJECTED VS OK DN | 479 | -1.973 | 0.00 |

|                                                                   |     |        |      |
|-------------------------------------------------------------------|-----|--------|------|
| BOYAULT LIVER CANCER SUBCLASS G3 UP                               | 181 | -1.968 | 0.00 |
| REACTOME METABOLISM OF NON CODING RNA                             | 47  | -1.958 | 0.00 |
| WILCOX RESPONSE TO PROGESTERONE UP                                | 125 | -1.951 | 0.00 |
| DAZARD RESPONSE TO UV NHEK DN                                     | 296 | -1.951 | 0.00 |
| GREENBAUM E2A TARGETS UP                                          | 31  | -1.947 | 0.00 |
| PENG GLUCOSE DEPRIVATION DN                                       | 150 | -1.945 | 0.00 |
| CAIRO LIVER DEVELOPMENT UP                                        | 148 | -1.942 | 0.00 |
| FLORIO NEOCORTEX BASAL RADIAL GLIA DN                             | 182 | -1.940 | 0.00 |
| XU HGF TARGETS INDUCED BY AKT1 48HR DN                            | 24  | -1.939 | 0.00 |
| HORIUCHI WTAP TARGETS DN                                          | 284 | -1.938 | 0.00 |
| FERREIRA EWINGS SARCOMA UNSTABLE VS STABLE UP                     | 144 | -1.938 | 0.00 |
| SENGUPTA NASOPHARYNGEAL CARCINOMA WITH LMP1 UP                    | 329 | -1.937 | 0.00 |
| HU ANGIOGENESIS DN                                                | 35  | -1.935 | 0.00 |
| WHITFIELD CELL CYCLE S                                            | 144 | -1.935 | 0.00 |
| CHEN HOXA5 TARGETS 9HR UP                                         | 201 | -1.934 | 0.00 |
| LOPEZ MBD TARGETS IMPRINTED AND X LINKED                          | 15  | -1.932 | 0.00 |
| GRAHAM NORMAL QUIESCENT VS NORMAL DIVIDING DN                     | 80  | -1.922 | 0.00 |
| PUJANA XPRSS INT NETWORK                                          | 157 | -1.922 | 0.00 |
| BONOME OVARIAN CANCER POOR SURVIVAL UP                            | 30  | -1.919 | 0.00 |
| VANTVEER BREAST CANCER METASTASIS DN                              | 106 | -1.918 | 0.00 |
| KIM WT1 TARGETS DN                                                | 410 | -1.914 | 0.00 |
| TIEN INTESTINE PROBIOTICS 2HR DN                                  | 84  | -1.912 | 0.01 |
| KEGG CELL CYCLE                                                   | 120 | -1.903 | 0.01 |
| ZHENG FOXP3 TARGETS IN T LYMPHOCYTE DN                            | 29  | -1.900 | 0.01 |
| IKEDA MIR133 TARGETS UP                                           | 41  | -1.896 | 0.01 |
| KANG DOXORUBICIN RESISTANCE UP                                    | 50  | -1.882 | 0.01 |
| RHODES UNDIFFERENTIATED CANCER                                    | 65  | -1.881 | 0.01 |
| ROME INSULIN TARGETS IN MUSCLE UP                                 | 391 | -1.880 | 0.01 |
| SAKAI CHRONIC HEPATITIS VS LIVER CANCER UP                        | 73  | -1.879 | 0.01 |
| ZHANG TLX TARGETS 36HR DN                                         | 181 | -1.878 | 0.01 |
| REACTOME CLEAVAGE OF GROWING TRANSCRIPT IN THE TERMINATION REGION | 42  | -1.875 | 0.01 |

|                                                          |     |        |      |
|----------------------------------------------------------|-----|--------|------|
| CHIARADONNA NEOPLASTIC TRANSFORMATION KRAS UP            | 111 | -1.870 | 0.01 |
| LEE EARLY T LYMPHOCYTE UP                                | 88  | -1.869 | 0.01 |
| RODWELL AGING KIDNEY NO BLOOD DN                         | 138 | -1.868 | 0.01 |
| MORI IMMATURE B LYMPHOCYTE DN                            | 87  | -1.867 | 0.01 |
| LEE LIVER CANCER SURVIVAL DN                             | 163 | -1.860 | 0.01 |
| LY AGING OLD DN                                          | 54  | -1.854 | 0.01 |
| BURTON ADIPOGENESIS 12                                   | 31  | -1.848 | 0.01 |
| ALONSO METASTASIS UP                                     | 173 | -1.846 | 0.01 |
| REACTOME PROCESSING OF CAPPED INTRON CONTAINING PRE MRNA | 132 | -1.844 | 0.01 |
| CHIARETTI T ALL RELAPSE PROGNOSIS                        | 16  | -1.844 | 0.01 |
| WU APOPTOSIS BY CDKN1A VIA TP53                          | 52  | -1.843 | 0.01 |
| VERHAAK GLIOBLASTOMA NEURAL                              | 106 | -1.842 | 0.01 |
| MARKEY RB1 ACUTE LOF UP                                  | 218 | -1.836 | 0.01 |
| MMS MOUSE LYMPH HIGH 4HRS UP                             | 32  | -1.829 | 0.01 |
| MOREAUX MULTIPLE MYELOMA BY TACI DN                      | 153 | -1.829 | 0.01 |
| BROWNE HCMV INFECTION 10HR DN                            | 48  | -1.828 | 0.01 |
| TOOKER GEMCITABINE RESISTANCE DN                         | 118 | -1.827 | 0.01 |
| LEE RECENT THYMIC EMIGRANT                               | 182 | -1.823 | 0.01 |
| RICKMAN METASTASIS UP                                    | 309 | -1.822 | 0.01 |
| MAYBURD RESPONSE TO L663536 DN                           | 50  | -1.822 | 0.01 |
| OSMAN BLADDER CANCER UP                                  | 360 | -1.821 | 0.01 |
| WHITEFORD PEDIATRIC CANCER MARKERS                       | 110 | -1.821 | 0.01 |
| EPPERT PROGENITOR                                        | 119 | -1.818 | 0.01 |
| TURASHVILI BREAST DUCTAL CARCINOMA VS LOBULAR NORMAL UP  | 69  | -1.818 | 0.01 |
| MISSIAGLIA REGULATED BY METHYLATION DN                   | 113 | -1.818 | 0.01 |
| ZHANG TLX TARGETS DN                                     | 87  | -1.815 | 0.01 |
| PICCALUGA ANGIOIMMUNOBLASTIC LYMPHOMA DN                 | 122 | -1.814 | 0.01 |
| ZHENG FOXP3 TARGETS UP                                   | 22  | -1.812 | 0.01 |
| ROSTY CERVICAL CANCER PROLIFERATION CLUSTER              | 132 | -1.811 | 0.01 |
| BENPORATH ES 1                                           | 355 | -1.808 | 0.02 |

|                                                        |     |        |      |
|--------------------------------------------------------|-----|--------|------|
| ZHANG TLX TARGETS 60HR DN                              | 257 | -1.807 | 0.02 |
| ZHENG FOXP3 TARGETS IN THYMUS UP                       | 170 | -1.805 | 0.02 |
| FINETTI BREAST CANCERS KINOME GRAY                     | 15  | -1.804 | 0.02 |
| REACTOME MRNA 3 END PROCESSING                         | 33  | -1.799 | 0.02 |
| SEIDEN MET SIGNALING                                   | 19  | -1.798 | 0.02 |
| MORI PRE BI LYMPHOCYTE UP                              | 72  | -1.795 | 0.02 |
| PECE MAMMARY STEM CELL DN                              | 127 | -1.795 | 0.02 |
| BENPORATH PROLIFERATION                                | 134 | -1.795 | 0.02 |
| BOYAULT LIVER CANCER SUBCLASS G23 UP                   | 49  | -1.794 | 0.02 |
| THUM SYSTOLIC HEART FAILURE UP                         | 313 | -1.793 | 0.02 |
| LE EGR2 TARGETS UP                                     | 103 | -1.793 | 0.02 |
| FLECHNER PBL KIDNEY TRANSPLANT OK VS DONOR DN          | 36  | -1.791 | 0.02 |
| BOYAULT LIVER CANCER SUBCLASS G123 UP                  | 44  | -1.791 | 0.02 |
| BLALOCK ALZHEIMERS DISEASE INCIPIENT DN                | 151 | -1.790 | 0.02 |
| TARTE PLASMA CELL VS PLASMABLAST DN                    | 288 | -1.789 | 0.02 |
| BIOCARTA PROTEASOME PATHWAY                            | 28  | -1.787 | 0.02 |
| BECKER TAMOXIFEN RESISTANCE DN                         | 45  | -1.776 | 0.02 |
| BIOCARTA CHEMICAL PATHWAY                              | 22  | -1.775 | 0.02 |
| HEDENFALK BREAST CANCER BRCA1 VS BRCA2                 | 153 | -1.775 | 0.02 |
| HADDAD T LYMPHOCYTE AND NK PROGENITOR UP               | 68  | -1.774 | 0.02 |
| CHIARADONNA NEOPLASTIC TRANSFORMATION CDC25 UP         | 104 | -1.770 | 0.02 |
| ALONSO METASTASIS EMT UP                               | 30  | -1.770 | 0.02 |
| DEN INTERACT WITH LCA5                                 | 25  | -1.770 | 0.02 |
| CHANG CYCLING GENES                                    | 135 | -1.769 | 0.02 |
| CHESLER BRAIN HIGHEST EXPRESSION                       | 36  | -1.766 | 0.02 |
| BAELDE DIABETIC NEPHROPATHY DN                         | 400 | -1.766 | 0.02 |
| TURASHVILI BREAST DUCTAL CARCINOMA VS DUCTAL NORMAL UP | 40  | -1.764 | 0.02 |
| VILLANUEVA LIVER CANCER KRT19 UP                       | 158 | -1.762 | 0.02 |
| REICHERT MITOSIS LIN9 TARGETS                          | 27  | -1.761 | 0.02 |
| REACTOME MRNA PROCESSING                               | 149 | -1.759 | 0.02 |
| NIKOLSKY BREAST CANCER 6P24 P22 AMPLICON               | 19  | -1.758 | 0.02 |

|                                                                        |     |        |      |
|------------------------------------------------------------------------|-----|--------|------|
| WANG SMARCE1 TARGETS DN                                                | 328 | -1.758 | 0.02 |
| BOYVAULT LIVER CANCER SUBCLASS G12 UP                                  | 36  | -1.757 | 0.02 |
| REACTOME SIGNALING BY TGF BETA RECEPTOR COMPLEX                        | 60  | -1.757 | 0.02 |
| JI RESPONSE TO FSH DN                                                  | 56  | -1.757 | 0.02 |
| KYNG WERNER SYNDROM AND NORMAL AGING UP                                | 81  | -1.754 | 0.02 |
| TCGA GLIOBLASTOMA COPY NUMBER DN                                       | 24  | -1.753 | 0.02 |
| ZHOU CELL CYCLE GENES IN IR RESPONSE 24HR                              | 116 | -1.750 | 0.02 |
| FINETTI BREAST CANCER KINOME RED                                       | 16  | -1.749 | 0.02 |
| LU EZH2 TARGETS DN                                                     | 338 | -1.748 | 0.02 |
| GRAHAM CML DIVIDING VS NORMAL QUIESCENT UP                             | 161 | -1.746 | 0.02 |
| VERNELL RETINOBLASTOMA PATHWAY UP                                      | 68  | -1.746 | 0.02 |
| KIM GERMINAL CENTER T HELPER UP                                        | 55  | -1.743 | 0.02 |
| REACTOME DOWNREGULATION OF SMAD2 3 SMAD4<br>TRANSCRIPTIONAL ACTIVITY   | 19  | -1.742 | 0.03 |
| PUJANA BRCA CENTERED NETWORK                                           | 114 | -1.741 | 0.03 |
| ODONNELL TFRC TARGETS DN                                               | 114 | -1.740 | 0.03 |
| KRIEG KDM3A TARGETS NOT HYPOXIA                                        | 166 | -1.739 | 0.03 |
| APPIERTO RESPONSE TO FENRETINIDE DN                                    | 46  | -1.735 | 0.03 |
| REACTOME TRANSPORT OF MATURE TRANSCRIPT TO CYTOPLASM                   | 51  | -1.733 | 0.03 |
| LINDGREN BLADDER CANCER CLUSTER 3 UP                                   | 293 | -1.723 | 0.03 |
| WANG CLIM2 TARGETS DN                                                  | 173 | -1.721 | 0.03 |
| REACTOME TRANSCRIPTIONAL ACTIVITY OF SMAD2 SMAD3<br>SMAD4 HETEROTRIMER | 36  | -1.721 | 0.03 |
| GENTILE UV RESPONSE CLUSTER D6                                         | 34  | -1.718 | 0.03 |
| LAIHO COLORECTAL CANCER SERRATED UP                                    | 102 | -1.716 | 0.03 |
| REACTOME REGULATION OF MITOTIC CELL CYCLE                              | 75  | -1.715 | 0.03 |
| CHIANG LIVER CANCER SUBCLASS PROLIFERATION UP                          | 160 | -1.711 | 0.03 |
| MARTORIATI MDM4 TARGETS NEUROEPITHELIUM DN                             | 121 | -1.706 | 0.03 |
| SHEDDEN LUNG CANCER POOR SURVIVAL A6                                   | 410 | -1.706 | 0.03 |
| REACTOME PROCESSING OF CAPPED INTRONLESS PRE MRNA                      | 23  | -1.705 | 0.03 |
| KOBAYASHI EGFR SIGNALING 24HR DN                                       | 238 | -1.705 | 0.03 |
| SOTIRIOU BREAST CANCER GRADE 1 VS 3 UP                                 | 141 | -1.705 | 0.03 |



|                                             |     |        |      |
|---------------------------------------------|-----|--------|------|
| SARRIO EPITHELIAL MESENCHYMAL TRANSITION UP | 168 | -1.704 | 0.03 |
| BROWNE HCMV INFECTION 18HR UP               | 157 | -1.704 | 0.03 |
| PEDERSEN METASTASIS BY ERBB2 ISOFORM 3      | 15  | -1.704 | 0.03 |
| YANG BREAST CANCER ESR1 LASER DN            | 47  | -1.704 | 0.03 |
| RODWELL AGING KIDNEY DN                     | 125 | -1.703 | 0.03 |
| AIYAR COBRA1 TARGETS UP                     | 33  | -1.701 | 0.03 |
| REACTOME MRNA SPLICING                      | 104 | -1.701 | 0.03 |
| STEIN ESR1 TARGETS                          | 78  | -1.699 | 0.04 |
| DITTMER PTHLH TARGETS UP                    | 108 | -1.699 | 0.04 |
| ZHENG BOUND BY FOXP3                        | 396 | -1.698 | 0.04 |
| GOLDRATH ANTIGEN RESPONSE                   | 285 | -1.697 | 0.04 |
| YANAGIHARA ESX1 TARGETS                     | 27  | -1.695 | 0.04 |
| PUIFFE INVASION INHIBITED BY ASCITES DN     | 136 | -1.692 | 0.04 |
| WANG TUMOR INVASIVENESS DN                  | 196 | -1.690 | 0.04 |
| ISHIDA E2F TARGETS                          | 49  | -1.690 | 0.04 |
| GENTILE UV RESPONSE CLUSTER D2              | 39  | -1.690 | 0.04 |
| GOLDRATH HOMEOSTATIC PROLIFERATION          | 159 | -1.690 | 0.04 |
| CHARAFE BREAST CANCER LUMINAL VS BASAL DN   | 381 | -1.689 | 0.04 |
| REACTOME G1 S TRANSITION                    | 106 | -1.689 | 0.04 |
| FOURNIER ACINAR DEVELOPMENT LATE 2          | 264 | -1.689 | 0.04 |
| IGLESIAS E2F TARGETS UP                     | 132 | -1.686 | 0.04 |
| TERAO AOX4 TARGETS SKIN DN                  | 19  | -1.686 | 0.04 |
| PETRETTO CARDIAC HYPERTROPHY                | 33  | -1.684 | 0.04 |
| DEURIG T CELL PROLYMPHOCYTIC LEUKEMIA DN    | 244 | -1.683 | 0.04 |
| EGUCHI CELL CYCLE RBI TARGETS               | 23  | -1.682 | 0.04 |
| MOHANKUMAR HOXA1 TARGETS UP                 | 370 | -1.678 | 0.04 |
| WONG EMBRYONIC STEM CELL CORE               | 330 | -1.678 | 0.04 |
| RUIZ TNC TARGETS DN                         | 132 | -1.677 | 0.04 |
| REACTOME PHOSPHORYLATION OF THE APC C       | 16  | -1.675 | 0.04 |
| AMUNDSON GAMMA RADIATION RESPONSE           | 38  | -1.675 | 0.04 |
| BROWNE HCMV INFECTION 6HR DN                | 143 | -1.674 | 0.04 |

|                                                                                                                                            |     |        |      |
|--------------------------------------------------------------------------------------------------------------------------------------------|-----|--------|------|
| DACOSTA UV RESPONSE VIA ERCC3 XPCS DN                                                                                                      | 79  | -1.671 | 0.04 |
| MOLENAAR TARGETS OF CCND1 AND CDK4 DN                                                                                                      | 49  | -1.668 | 0.04 |
| PAL PRMT5 TARGETS UP                                                                                                                       | 194 | -1.667 | 0.04 |
| MATZUK EMBRYONIC GERM CELL                                                                                                                 | 15  | -1.667 | 0.04 |
| BONCI TARGETS OF MIR15A AND MIR16 1                                                                                                        | 81  | -1.667 | 0.04 |
| SCIBETTA KDM5B TARGETS DN                                                                                                                  | 77  | -1.666 | 0.04 |
| GAZDA DIAMOND BLACKFAN ANEMIA PROGENITOR DN                                                                                                | 61  | -1.665 | 0.04 |
| BIOCARTA CTCF PATHWAY                                                                                                                      | 20  | -1.664 | 0.04 |
| PETROVA ENDOTHELIUM LYMPHATIC VS BLOOD UP                                                                                                  | 114 | -1.664 | 0.04 |
| HOSHIDA LIVER CANCER SUBCLASS S2                                                                                                           | 109 | -1.663 | 0.04 |
| SASAKI ADULT T CELL LEUKEMIA                                                                                                               | 159 | -1.662 | 0.04 |
| KAYO AGING MUSCLE DN                                                                                                                       | 111 | -1.661 | 0.04 |
| EHLERS ANEUPLOIDY UP                                                                                                                       | 36  | -1.661 | 0.04 |
| FARMER BREAST CANCER CLUSTER 2                                                                                                             | 32  | -1.661 | 0.04 |
| DAZARD UV RESPONSE CLUSTER G6                                                                                                              | 142 | -1.659 | 0.04 |
| KONG E2F3 TARGETS                                                                                                                          | 87  | -1.659 | 0.04 |
| BIOCARTA CCR3 PATHWAY                                                                                                                      | 18  | -1.658 | 0.04 |
| MATTIOLI MGUS VS PCL                                                                                                                       | 84  | -1.658 | 0.04 |
| JIANG AGING CEREBRAL CORTEX UP                                                                                                             | 32  | -1.658 | 0.04 |
| BURTON ADIPOGENESIS 3                                                                                                                      | 98  | -1.653 | 0.05 |
| REACTOME MITOTIC G1 G1 S PHASES                                                                                                            | 128 | -1.649 | 0.05 |
| PLASARI TGFB1 TARGETS 10HR DN                                                                                                              | 201 | -1.649 | 0.05 |
| SUNG METASTASIS STROMA DN                                                                                                                  | 45  | -1.649 | 0.05 |
| FRASOR RESPONSE TO SERM OR FULVESTRANT UP                                                                                                  | 20  | -1.648 | 0.05 |
| KOKKINAKIS METHIONINE DEPRIVATION 96HR UP                                                                                                  | 104 | -1.647 | 0.05 |
| STEARMAN LUNG CANCER EARLY VS LATE UP                                                                                                      | 117 | -1.645 | 0.05 |
| XU HGF SIGNALING NOT VIA AKT1 48HR DN                                                                                                      | 20  | -1.645 | 0.05 |
| PUJANA BRCA2 PCC NETWORK                                                                                                                   | 380 | -1.644 | 0.05 |
| PID NFKAPPAB CANONICAL PATHWAY                                                                                                             | 21  | -1.644 | 0.05 |
| REACTOME INHIBITION OF THE PROTEOLYTIC ACTIVITY OF APC C<br>REQUIRED FOR THE ONSET OF ANAPHASE BY MITOTIC SPINDLE<br>CHECKPOINT COMPONENTS | 17  | -1.641 | 0.05 |

|                                                                            |     |        |      |
|----------------------------------------------------------------------------|-----|--------|------|
| BERENJENO TRANSFORMED BY RHOA UP                                           | 491 | -1.641 | 0.05 |
| NIKOLSKY BREAST CANCER 16P13 AMPLICON                                      | 87  | 2.136  | 0.01 |
| LU EZH2 TARGETS UP                                                         | 239 | 2.041  | 0.02 |
| NIKOLSKY BREAST CANCER 7P22 AMPLICON                                       | 30  | 2.005  | 0.03 |
| LI DCP2 BOUND MRNA                                                         | 83  | 2.005  | 0.02 |
| SCHLOSSER SERUM RESPONSE UP                                                | 114 | 1.997  | 0.02 |
| SENGUPTA EBNA1 ANTICORRELATED                                              | 122 | 1.997  | 0.01 |
| DIRMEIER LMP1 RESPONSE LATE DN                                             | 28  | 1.990  | 0.01 |
| WALLACE JAK2 TARGETS UP                                                    | 22  | 1.983  | 0.01 |
| NIKOLSKY BREAST CANCER 16Q24 AMPLICON                                      | 43  | 1.958  | 0.02 |
| REACTOME FORMATION OF THE TERNARY COMPLEX AND SUBSEQUENTLY THE 43S COMPLEX | 48  | 1.950  | 0.02 |
| DACOSTA UV RESPONSE VIA ERCC3 UP                                           | 292 | 1.947  | 0.02 |
| RICKMAN METASTASIS DN                                                      | 211 | 1.931  | 0.02 |
| CERIBELLI GENES INACTIVE AND BOUND BY NFY                                  | 20  | 1.930  | 0.02 |
| HAMAI APOPTOSIS VIA TRAIL DN                                               | 155 | 1.926  | 0.02 |
| MARTENS TRETINOIN RESPONSE UP                                              | 440 | 1.896  | 0.03 |
| CHNG MULTIPLE MYELOMA HYPERPLOID UP                                        | 50  | 1.872  | 0.03 |
| MIKKELSEN MCV6 HCP WITH H3K27ME3                                           | 292 | 1.860  | 0.04 |
| KESHELAVA MULTIPLE DRUG RESISTANCE                                         | 68  | 1.854  | 0.04 |
| GINESTIER BREAST CANCER ZNF217 AMPLIFIED DN                                | 293 | 1.847  | 0.04 |
| SCHLOSSER MYC AND SERUM RESPONSE SYNERGY                                   | 32  | 1.845  | 0.04 |
| MEDINA SMARCA4 TARGETS                                                     | 33  | 1.843  | 0.04 |
| HOLLEMAN ASPARAGINASE RESISTANCE B ALL UP                                  | 24  | 1.828  | 0.05 |
| KORKOLA CORRELATED WITH POU5F1                                             | 32  | 1.826  | 0.04 |
| NAKAMURA METASTASIS MODEL UP                                               | 35  | 1.817  | 0.05 |

**Table S3.** List of 100 top deregulated genes

| <b>Transcript name</b> | <b>LogFC</b> | <b>FDR</b> | <b>Gene_function</b>                                                                                                       |
|------------------------|--------------|------------|----------------------------------------------------------------------------------------------------------------------------|
| NPIPA8                 | 7,46         | 1,4E-05    | nuclear pore complex interacting protein family member A8 [Source:HGNC Symbol;Acc:HGNC:41983]                              |
| HIST1H4K               | 7,18         | 5,2E-04    | histone cluster 1 H4 family member k [Source:HGNC Symbol;Acc:HGNC:4784]                                                    |
| CSAG1                  | 6,80         | 3,5E-05    | chondrosarcoma associated gene 1 [Source:HGNC Symbol;Acc:HGNC:24294]                                                       |
| INO80B-WBP1            | 6,72         | 9,7E-04    | INO80B-WBP1 readthrough (NMD candidate) [Source:HGNC Symbol;Acc:HGNC:49199]                                                |
| TTR                    | 6,06         | 3,8E-08    | transthyretin [Source:HGNC Symbol;Acc:HGNC:12405]                                                                          |
| C15orf38-AP3S2         | 5,76         | 1,7E-06    | C15orf38-AP3S2 readthrough [Source:HGNC Symbol;Acc:HGNC:38824]                                                             |
| CSAG2                  | 5,70         | 1,1E-04    | CSAG family member 2 [Source:HGNC Symbol;Acc:HGNC:16847]                                                                   |
| CSAG3                  | 5,70         | 1,1E-04    | CSAG family member 3 [Source:HGNC Symbol;Acc:HGNC:26237]                                                                   |
| MGAT2                  | 5,54         | 2,7E-03    | mannosyl (alpha-1,6-)-glycoprotein beta-1,2-N-acetylglucosaminyltransferase [Source:HGNC Symbol;Acc:HGNC:7045]             |
| MAGEA12                | 5,32         | 1,9E-04    | MAGE family member A12 [Source:HGNC Symbol;Acc:HGNC:6799]                                                                  |
| TBX1                   | 5,27         | 3,2E-06    | T-box 1 [Source:HGNC Symbol;Acc:HGNC:11592]                                                                                |
| CXCL11                 | 5,25         | 2,2E-04    | C-X-C motif chemokine ligand 11 [Source:HGNC Symbol;Acc:HGNC:10638]                                                        |
| DAZ1                   | 4,06         | 6,0E-04    | deleted in azoospermia 1 [Source:HGNC Symbol;Acc:HGNC:2682]                                                                |
| TUBB8                  | 3,97         | 2,6E-09    | tubulin beta 8 class VIII [Source:HGNC Symbol;Acc:HGNC:20773]                                                              |
| NKX6-1                 | 3,96         | 8,0E-04    | NK6 homeobox 1 [Source:HGNC Symbol;Acc:HGNC:7839]                                                                          |
| NOXO1                  | 3,87         | 3,0E-05    | NADPH oxidase organizer 1 [Source:HGNC Symbol;Acc:HGNC:19404]                                                              |
| RAC3                   | 3,84         | 1,6E-12    | ras-related C3 botulinum toxin substrate 3 (rho family, small GTP binding protein Rac3) [Source:HGNC Symbol;Acc:HGNC:9803] |
| HS3ST6                 | 3,76         | 2,8E-04    | heparan sulfate-glucosamine 3-sulfotransferase 6 [Source:HGNC Symbol;Acc:HGNC:14178]                                       |
| OC90                   | 3,62         | 2,4E-06    | otoconin 90 [Source:HGNC Symbol;Acc:HGNC:8100]                                                                             |
| CHKB-CPT1B             | 3,61         | 1,5E-03    | CHKB-CPT1B readthrough (NMD candidate) [Source:HGNC Symbol;Acc:HGNC:41998]                                                 |
| DEFB124                | 3,57         | 1,6E-04    | defensin beta 124 [Source:HGNC Symbol;Acc:HGNC:18104]                                                                      |
| NPHP3-ACAD11           | 3,55         | 1,9E-04    | NPHP3-ACAD11 readthrough (NMD candidate) [Source:HGNC Symbol;Acc:HGNC:48351]                                               |
| MYBL2                  | 3,27         | 7,5E-12    | MYB proto-oncogene like 2 [Source:HGNC Symbol;Acc:HGNC:7548]                                                               |
| NLRP5                  | 3,27         | 2,7E-03    | NLR family pyrin domain containing 5 [Source:HGNC Symbol;Acc:HGNC:21269]                                                   |
| MEF2B                  | 3,26         | 2,2E-03    | myocyte enhancer factor 2B [Source:HGNC Symbol;Acc:HGNC:6995]                                                              |
| EMX2                   | 3,25         | 1,3E-02    | empty spiracles homeobox 2 [Source:HGNC Symbol;Acc:HGNC:3341]                                                              |
| SGCA                   | 3,20         | 1,9E-03    | sarcoglycan alpha [Source:HGNC Symbol;Acc:HGNC:10805]                                                                      |
| GLS2                   | 3,17         | 4,5E-05    | glutaminase 2 [Source:HGNC Symbol;Acc:HGNC:29570]                                                                          |
| RBAK-RBAKDN            | 3,15         | 1,2E-02    | RBAK-RBAKDN readthrough [Source:HGNC Symbol;Acc:HGNC:42971]                                                                |

|                 |       |         |                                                                                             |
|-----------------|-------|---------|---------------------------------------------------------------------------------------------|
| POLR2J2         | 3,08  | 1,7E-02 | RNA polymerase II subunit J2 [Source:NCBI gene;Acc:246721]                                  |
| TFAP2E          | 3,06  | 2,2E-03 | transcription factor AP-2 epsilon [Source:HGNC Symbol;Acc:HGNC:30774]                       |
| POTEE           | 3,05  | 2,8E-03 | POTE ankyrin domain family member E [Source:HGNC Symbol;Acc:HGNC:33895]                     |
| RNASEK-C17orf49 | 3,04  | 1,8E-13 | RNASEK-C17orf49 readthrough [Source:HGNC Symbol;Acc:HGNC:44419]                             |
| TMEM121         | 3,04  | 7,8E-10 | transmembrane protein 121 [Source:HGNC Symbol;Acc:HGNC:20511]                               |
| DPP7            | 3,01  | 4,9E-11 | dipeptidyl peptidase 7 [Source:HGNC Symbol;Acc:HGNC:14892]                                  |
| GDF5            | 2,99  | 2,2E-04 | growth differentiation factor 5 [Source:HGNC Symbol;Acc:HGNC:4220]                          |
| PNMA6F          | 2,97  | 9,1E-05 | paraneoplastic Ma antigen family member 6F [Source:HGNC Symbol;Acc:HGNC:53119]              |
| ZIC1            | 2,96  | 2,4E-03 | Zic family member 1 [Source:HGNC Symbol;Acc:HGNC:12872]                                     |
| RNPEPL1         | 2,95  | 3,9E-12 | arginyl aminopeptidase like 1 [Source:HGNC Symbol;Acc:HGNC:10079]                           |
| PHACTR3         | 2,95  | 1,9E-04 | phosphatase and actin regulator 3 [Source:HGNC Symbol;Acc:HGNC:15833]                       |
| IGLON5          | 2,94  | 8,9E-14 | IgLON family member 5 [Source:HGNC Symbol;Acc:HGNC:34550]                                   |
| CDC34           | 2,93  | 6,4E-18 | cell division cycle 34 [Source:HGNC Symbol;Acc:HGNC:1734]                                   |
| EVA1B           | 2,93  | 3,2E-08 | eva-1 homolog B [Source:HGNC Symbol;Acc:HGNC:25558]                                         |
| RBM46           | 2,92  | 6,2E-05 | RNA binding motif protein 46 [Source:HGNC Symbol;Acc:HGNC:28401]                            |
| SP140L          | 2,91  | 2,1E-04 | SP140 nuclear body protein like [Source:HGNC Symbol;Acc:HGNC:25105]                         |
| NTAN1           | 2,90  | 1,0E-06 | N-terminal asparagine amidase [Source:HGNC Symbol;Acc:HGNC:29909]                           |
| GOLGA6D         | 2,89  | 6,9E-03 | golgin A6 family member D [Source:HGNC Symbol;Acc:HGNC:32204]                               |
| GRIN1           | 2,89  | 2,1E-04 | glutamate ionotropic receptor NMDA type subunit 1 [Source:HGNC Symbol;Acc:HGNC:4584]        |
| UTF1            | 2,88  | 1,6E-06 | undifferentiated embryonic cell transcription factor 1 [Source:HGNC Symbol;Acc:HGNC:12634]  |
| CLDN16          | 2,88  | 3,5E-03 | claudin 16 [Source:HGNC Symbol;Acc:HGNC:2037]                                               |
| HHEX            | -2,53 | 4,5E-04 | hematopoietically expressed homeobox [Source:HGNC Symbol;Acc:HGNC:4901]                     |
| ZNF280C         | -2,55 | 2,0E-07 | zinc finger protein 280C [Source:HGNC Symbol;Acc:HGNC:25955]                                |
| PLD6            | -2,57 | 5,3E-03 | phospholipase D family member 6 [Source:HGNC Symbol;Acc:HGNC:30447]                         |
| S100A6          | -2,57 | 3,4E-04 | S100 calcium binding protein A6 [Source:HGNC Symbol;Acc:HGNC:10496]                         |
| ISY1-RAB43      | -2,59 | 3,0E-03 | ISY1-RAB43 readthrough [Source:HGNC Symbol;Acc:HGNC:42969]                                  |
| MAGEL2          | -2,61 | 4,0E-05 | MAGE family member L2 [Source:HGNC Symbol;Acc:HGNC:6814]                                    |
| EPHA6           | -2,63 | 5,5E-04 | EPH receptor A6 [Source:HGNC Symbol;Acc:HGNC:19296]                                         |
| CHCHD2          | -2,69 | 2,5E-03 | coiled-coil-helix-coiled-coil-helix domain containing 2 [Source:HGNC Symbol;Acc:HGNC:21645] |
| WFDC1           | -2,69 | 1,7E-04 | WAP four-disulfide core domain 1 [Source:HGNC Symbol;Acc:HGNC:15466]                        |
| RWDD2B          | -2,71 | 2,7E-03 | RWD domain containing 2B [Source:HGNC                                                       |

|          |       |         |                                                                                                 |
|----------|-------|---------|-------------------------------------------------------------------------------------------------|
|          |       |         | Symbol;Acc:HGNC:1302]                                                                           |
| NPIPA7   | -2,77 | 2,3E-02 | nuclear pore complex interacting protein family member A7 [Source:HGNC Symbol;Acc:HGNC:41982]   |
| FAM71D   | -2,79 | 4,5E-05 | family with sequence similarity 71 member D [Source:HGNC Symbol;Acc:HGNC:20101]                 |
| VANGL2   | -2,80 | 2,0E-10 | VANGL planar cell polarity protein 2 [Source:HGNC Symbol;Acc:HGNC:15511]                        |
| INPP4B   | -2,80 | 5,3E-03 | inositol polyphosphate-4-phosphatase type II B [Source:HGNC Symbol;Acc:HGNC:6075]               |
| ANKS1B   | -2,83 | 1,9E-08 | ankyrin repeat and sterile alpha motif domain containing 1B [Source:HGNC Symbol;Acc:HGNC:24600] |
| NTS      | -2,84 | 5,8E-07 | neurotensin [Source:HGNC Symbol;Acc:HGNC:8038]                                                  |
| MAGEB3   | -2,89 | 1,8E-03 | MAGE family member B3 [Source:HGNC Symbol;Acc:HGNC:6810]                                        |
| HIBADH   | -2,90 | 2,8E-07 | 3-hydroxyisobutyrate dehydrogenase [Source:HGNC Symbol;Acc:HGNC:4907]                           |
| HIST1H1A | -2,90 | 5,5E-04 | histone cluster 1 H1 family member a [Source:HGNC Symbol;Acc:HGNC:4715]                         |
| ANXA1    | -2,92 | 2,6E-05 | annexin A1 [Source:HGNC Symbol;Acc:HGNC:533]                                                    |
| NR1I2    | -2,94 | 1,9E-04 | nuclear receptor subfamily 1 group I member 2 [Source:HGNC Symbol;Acc:HGNC:7968]                |
| BCL2L10  | -2,97 | 4,7E-04 | BCL2 like 10 [Source:HGNC Symbol;Acc:HGNC:993]                                                  |
| CTAGE8   | -3,02 | 7,7E-05 | CTAGE family member 8 [Source:HGNC Symbol;Acc:HGNC:37294]                                       |
| PCDH15   | -3,02 | 3,0E-03 | protocadherin related 15 [Source:HGNC Symbol;Acc:HGNC:14674]                                    |
| SERPINB4 | -3,21 | 1,8E-04 | serpin family B member 4 [Source:HGNC Symbol;Acc:HGNC:10570]                                    |
| RIPPLY2  | -3,33 | 1,7E-04 | rippy transcriptional repressor 2 [Source:HGNC Symbol;Acc:HGNC:21390]                           |
| VEGFC    | -3,39 | 2,8E-05 | vascular endothelial growth factor C [Source:HGNC Symbol;Acc:HGNC:12682]                        |
| RNF128   | -3,39 | 6,8E-07 | ring finger protein 128, E3 ubiquitin protein ligase [Source:HGNC Symbol;Acc:HGNC:21153]        |
| SRR      | -3,43 | 5,8E-10 | serine racemase [Source:HGNC Symbol;Acc:HGNC:14398]                                             |
| CRTC2    | -3,50 | 1,2E-07 | CREB regulated transcription coactivator 2 [Source:HGNC Symbol;Acc:HGNC:27301]                  |
| SIK1     | -3,52 | 1,3E-03 | salt inducible kinase 1 [Source:HGNC Symbol;Acc:HGNC:11142]                                     |
| MTRNR2L1 | -3,56 | 7,0E-04 | MT-RNR2-like 1 [Source:HGNC Symbol;Acc:HGNC:37155]                                              |
| ESRRA    | -3,70 | 2,4E-07 | estrogen related receptor alpha [Source:HGNC Symbol;Acc:HGNC:3471]                              |
| FRMD1    | -3,73 | 4,2E-04 | FERM domain containing 1 [Source:HGNC Symbol;Acc:HGNC:21240]                                    |
| ARHGAP36 | -3,75 | 2,6E-05 | Rho GTPase activating protein 36 [Source:HGNC Symbol;Acc:HGNC:26388]                            |
| NKX2-5   | -3,80 | 9,7E-03 | NK2 homeobox 5 [Source:HGNC Symbol;Acc:HGNC:2488]                                               |
| PDCL2    | -3,81 | 1,5E-04 | phosducin like 2 [Source:HGNC Symbol;Acc:HGNC:29524]                                            |
| CXCR5    | -3,84 | 1,4E-04 | C-X-C motif chemokine receptor 5 [Source:HGNC Symbol;Acc:HGNC:1060]                             |
| ZFP36    | -3,84 | 6,1E-08 | ZFP36 ring finger protein [Source:HGNC Symbol;Acc:HGNC:12862]                                   |
| PRR16    | -4,11 | 1,7E-07 | proline rich 16 [Source:HGNC Symbol;Acc:HGNC:29654]                                             |
| SERPINB3 | -4,19 | 5,3E-04 | serpin family B member 3 [Source:HGNC Symbol;Acc:HGNC:10569]                                    |
| HSPB8    | -4,22 | 6,6E-07 | heat shock protein family B (small) member 8 [Source:HGNC                                       |

|         |       |         |                                                                                 |
|---------|-------|---------|---------------------------------------------------------------------------------|
|         |       |         | Symbol;Acc:HGNC:30171]                                                          |
| RHOXF2  | -5,01 | 5,4E-03 | Rhox homeobox family member 2 [Source:HGNC<br>Symbol;Acc:HGNC:30011]            |
| LGALS7B | -5,05 | 5,7E-03 | galectin 7B [Source:HGNC Symbol;Acc:HGNC:34447]                                 |
| ZBED6   | -5,24 | 1,5E-02 | zinc finger BED-type containing 6 [Source:HGNC<br>Symbol;Acc:HGNC:33273]        |
| SYNC    | -5,86 | 1,0E-10 | syncoilin, intermediate filament protein [Source:HGNC<br>Symbol;Acc:HGNC:28897] |
| HBD     | -5,88 | 5,4E-03 | hemoglobin subunit delta [Source:HGNC<br>Symbol;Acc:HGNC:4829]                  |
| ZNF717  | -6,54 | 4,3E-08 | zinc finger protein 717 [Source:HGNC<br>Symbol;Acc:HGNC:29448]                  |
| NAP1L5  | -6,79 | 9,7E-07 | nucleosome assembly protein 1 like 5 [Source:HGNC<br>Symbol;Acc:HGNC:19968]     |
| TSPYL5  | -7,91 | 2,3E-08 | TSPY like 5 [Source:HGNC Symbol;Acc:HGNC:29367]                                 |

## Supplemental experimental procedures

### Transgenic overexpression of *Bcl-xL* in hESC

The human *Bcl-xL* gene was cloned into the LV500A-1 lentiviral vector pCDH (System Biosciences), expressed by the activity of the elongation factor-1alpha (EF-1alpha) promoter. The expression of GFP and puromycin resistance gene was driven by the phosphoglycerate kinase I gene promoter (PGK). The packaging plasmid (pCMVDR8.9) and encoding plasmid (VSV.G/ pMD.G) were donated by D. Trono (University of Geneva). Lentiviral particles were generated by transient co-transfection of human embryonic kidney 293T cells. The viral particles were 300-fold concentrated by ultracentrifugation, suspended in PBS containing 10mg/ml protamine sulphate (LeoPharma) and stored at  $-80^{\circ}\text{C}$ . Virus titers were determined by measuring the reverse transcriptase activity. A genetically normal subline of VUB03 was used for double transduction, first with  $10 \text{ mlof}1 \times 10^6$  TU/ml viral particles, and 6–8 h later  $30 \text{ mlof}1 \times 10^6$  TU/ml viral particles. GFP-positive cells were visualized using an IX-81 fluorescent microscope (Olympus) and selected by continuously adding 1 mg/ml of puromycin (Sigma-Aldrich) to the culture medium. After two passages during which the puromycin-containing medium was daily refreshed, 80% of the cells were GFP positive.

### Fastq files

After RNA sequencing, on average  $14.3 \times 10^6 \pm 6.4 \times 10^6$  reads were generated per sample. First, the reads were trimmed using cutadapt version 1.11 to remove the “QuantSeq FWD” adaptor sequence. To assess the quality of the reads, the FastQC algorithm was used on our sequences (Love et al., 2014). A Quality Control tool for High Throughput Sequence Data, website: <http://www.bioinformatics.babraham.ac.uk/projects/fastqc/>.

### Mapping Sequences

To obtain the count table for the genes, the reads were mapped against the Genome Reference Consortium Human Build 38 patch release 10 (GRCh38.p10) combined with a general transfer format (GTF) file, both downloaded from the ensembl database (Zerbino et al., 2018). The software used for the mapping was STAR (version 2.5.3) (Dobin et al., 2013).

### Count Tables

The RNA-Seq by Expectation Maximization (RSEM) (Li and Dewey, 2011) software (version 1.3.0) was used to produce the count table for each sample. RSEM algorithm was chosen because it is optimized for multi-mapped reads. On the 63967 ensembl's genes, only the 19847 coding genes were considered, and we removed the long non-coding RNAs, which were not useful for our analysis.

### RNA-seq analysis

The RNA-seq analysis was performed using the R software (version 3.3.2) with the edgeR (Robinson et al., 2010) and DESeq2 (Love et al., 2014) libraries. Only genes with a count per million (cpm) greater than 1 in at least two samples were considered. The raw counts were normalized using the trimmed mean of M values (Robinson and Oshlack, 2010) (TMM) algorithm. For each comparison, a different general linear model was built. Statistical testing was done using the empirical Bayes quasi-likelihood F-test. The normalized counts were then transformed in a  $\log_2$  fold-change ( $\log_2\text{FC}$ ) table with their associated statistics, p-value and false discovery rate (FDR). In each comparison, genes with a  $|\log_2\text{FC}| > 1$  and an  $\text{FDR} < 0.05$  were considered as significantly differentially expressed. A  $|\log_2\text{FC}| > 1$  means at least two times more or two times less transcript in the mutant group in comparison to the wild-type group.

The data was represented using two different methods; in both cases, all expressed genes were included. First, a heatmap and unsupervised hierarchical clustering was created using the heatmap.2 function from the gplot R library. Second, the data were represented using a multidimensional scaling (MDS) plot of distances between digital gene expression profiles. With the MDS method, the distance between the samples was calculated based on the  $\log_2\text{FC}$ . In the MDS, the Euclidean distances between samples were calculated and were then regressed against the original distance matrix and the predicted ordination distances for each pair.

### Ingenuity pathway analysis



Ingenuity Pathway Analysis (Krämer et al., 2014) (IPA) (QIAGEN Inc., <https://www.qiagenbioinformatics.com/products/ingenuity-pathway-analysis>) was used for the pathway analysis based on the differential gene expression between groups. The data were uploaded with their respective  $\log_2FC$ , FDR and p-value. IPA predicts the activation state of regulators by correlating literature reported effects with observed gene expression. In order to predict if a pathway is activated or inhibited, it computes the z-score. A z-score  $>2$  means activated, z-score  $<-2$  means inhibited and between means affected. Each z-score is associated with a p-value. To compute this z-score, for each prediction for each gene  $x_i$ , a score is associated to it.

### **Enrichr analysis**

The enrichment signatures was done using Enrichr (Chen et al., 2013; Kuleshov et al., 2016). The deregulated genes were used as input ( $|\log_2FC|>1$ ,  $FDR<0.05$ ). The outputs were selected from two libraries, 1) ENCODE and ChEA Consensus TFs from CHIP-X and 2) TRANSFAC and JASPAR PWMs. Only the enrichment with p-value  $<0.05$  in both comparisons were taken.

### **David analysis**

The pathway enrichment analysis was done using DAVID 6.8 (Huang et al., 2009a, 2009b). The top 1'000 genes with the highest  $\log_2FC$  in absolute value were selected. In the different categories, only the GO term were taken for account. The cutoff value was at least one of the two comparisons had to have a p-value below 0.05 for each GO-term.

### **Gene set enrichment analysis**

The Gene set enrichment analysis (GSEA) software was downloaded from (<http://software.broadinstitute.org/gsea/>). The ranking score for each score was computed for each coding gene  $CPM>1$  in at least two samples. The parameters set for each analysis were: enrichment statistic as weighted, number of permutation was 1000, exclude sets larger than 500 and exclude sets smaller than 15. The libraries used from Molecular Signatures Database v6.2 (MSigDB) were: positional gene sets (C1) and curated gene sets (C2). The gene sets were statistically relevant if their FDR was below 0.05. The gene sets were considered as positively enriched if their normalized enriched score (NES) was above 1.4 and negatively enriched if their  $NES<-1.4$  (Subramanian et al., 2005)

**Probes, assays and primers used for qPCR.**

| <b>Gene</b>   | <b>Taqman Assay / Sequence</b>                                                                                                           |
|---------------|------------------------------------------------------------------------------------------------------------------------------------------|
| <i>GUSB</i>   | Hs99999908_m1                                                                                                                            |
| <i>PAX6</i>   | Hs00240871_m1                                                                                                                            |
| <i>SOX1</i>   | Hs01057642_s1                                                                                                                            |
| <i>SOX17</i>  | Hs00751752_s1                                                                                                                            |
| <i>FOXA2</i>  | Hs00232764_m1                                                                                                                            |
| <i>T</i>      | Hs00610080_m1                                                                                                                            |
| <i>HAND1</i>  | Hs02330376_s1                                                                                                                            |
| <i>CHCHD2</i> | Hs00853326_g1                                                                                                                            |
| <i>GAPDH</i>  | Forward 5'-ATG-GAA-ATC-CCA-TCA-CCA-TCT-T-3'<br>Reverse 5'-CGC-CCC-ACT-TGA-TTT-TGG-3'<br>Probe 6-FAM- CAG-GAG-CGA-GAT-CC-MGB              |
| <i>OCT3A</i>  | Forward 5'-GGA-CAC-CTG-GCT-TCG-GAT-TT-3'<br>Reverse 5'-CAT-CAC-CTC-CAC-CAC-CTG-G-3'<br>Probe 6-FAM- GCC-TTC-TCG-CCC-CC-MGB               |
| <i>NANOG</i>  | Forward 5'-TGC-AAA-TGT-CTT-CTG-CTG-AGA-TG-3'<br>Reverse 5'-TCC-TGA-ATA-AGC-AGA-TCC-ATG-GA-3'<br>Probe 6-FAM- CAG-AGA-CTG-TCT-CTC-CTC-MGB |
| <i>UBC</i>    | Forward 5'-CGC-AGC-CGG-GAT-TTG-3'<br>Reverse 5'-TCA-AGT-GAC-GAT-CAC-AGC-GA-3'<br>Probe 6-FAM- TCG-CAG-TTC-TTG-TTT-GTG-MGB                |

## **Antibodies**

Primary antibodies were incubated overnight: PAX6 (Mouse Monoclonal IgG, Abcam, Cat# ab78545), OCT3A (Rabbit Monoclonal IgG, Cell Signalling, Cat# C30A3), SOX17 (Goat Polyclonal IgG, R&D Systems, Cat# AF1924), CHCHD2 (Rabbit Polyclonal, Proteintech #19424-I-AP) T (Goat Polyclonal, R & D Systems #AF2085). Secondary antibodies were incubated for 2-3h: Goat anti-Mouse (H+L) Alexa Fluor 488 (Thermo Fisher Scientific, Cat# A11001), Donkey anti-Goat IgG (H+L) Alexa Fluor 488 (Thermo Fisher Scientific, Cat# A-11055), Goat anti-Rabbit (H+L) Alexa Fluor 488 (Thermo Fisher Scientific, Cat# A-11034), Donkey anti-Rabbit (H+L) Alexa Fluor 546 (Thermo Fisher Scientific, Cat# A10040), Donkey anti-Mouse IgG (H+L) Alexa Fluor 594 (Thermo Fisher Scientific, Cat# R37115). Nuclear staining was performed with Hoechst 33342 (Thermo Fisher Scientific).

## References

- Chen, E.Y., Tan, C.M., Kou, Y., Duan, Q., Wang, Z., Meirelles, G.V., Clark, N.R., and Ma'ayan, A. (2013). Enrichr: interactive and collaborative HTML5 gene list enrichment analysis tool. *BMC Bioinformatics* *14*, 128.
- Dobin, A., Davis, C.A., Schlesinger, F., Drenkow, J., Zaleski, C., Jha, S., Batut, P., Chaisson, M., and Gingeras, T.R. (2013). STAR: ultrafast universal RNA-seq aligner. *Bioinformatics* *29*, 15–21.
- Huang, D.W., Sherman, B.T., and Lempicki, R.A. (2009a). Bioinformatics enrichment tools: paths toward the comprehensive functional analysis of large gene lists. *Nucleic Acids Res.* *37*, 1–13.
- Huang, D.W., Sherman, B.T., and Lempicki, R.A. (2009b). Systematic and integrative analysis of large gene lists using DAVID bioinformatics resources. *Nat. Protoc.* *4*, 44–57.
- Krämer, A., Green, J., Pollard, J., and Tugendreich, S. (2014). Causal analysis approaches in Ingenuity Pathway Analysis. *Bioinformatics* *30*, 523–530.
- Kuleshov, M. V, Jones, M.R., Rouillard, A.D., Fernandez, N.F., Duan, Q., Wang, Z., Koplev, S., Jenkins, S.L., Jagodnik, K.M., Lachmann, A., et al. (2016). Enrichr: a comprehensive gene set enrichment analysis web server 2016 update. *Nucleic Acids Res.* *44*, W90-7.
- Li, B., and Dewey, C.N. (2011). RSEM: accurate transcript quantification from RNA-Seq data with or without a reference genome. *BMC Bioinformatics* *12*, 323.
- Love, M.I., Huber, W., and Anders, S. (2014). Moderated estimation of fold change and dispersion for RNA-seq data with DESeq2. *Genome Biol.* *15*, 550.
- Robinson, M.D., and Oshlack, A. (2010). A scaling normalization method for differential expression analysis of RNA-seq data. *Genome Biol.* *11*, R25.
- Robinson, M.D., McCarthy, D.J., and Smyth, G.K. (2010). edgeR: a Bioconductor package for differential expression analysis of digital gene expression data. *Bioinformatics* *26*, 139–140.
- Subramanian, A., Tamayo, P., Mootha, V.K., Mukherjee, S., Ebert, B.L., Gillette, M.A., Paulovich, A., Pomeroy, S.L., Golub, T.R., Lander, E.S., et al. (2005). Gene set enrichment analysis: a knowledge-based approach for interpreting genome-wide expression profiles. *Proc. Natl. Acad. Sci. U. S. A.* *102*, 15545–15550.
- Zerbino, D.R., Achuthan, P., Akanni, W., Amode, M.R., Barrell, D., Bhai, J., Billis, K., Cummins, C., Gall, A., Girón, C.G., et al. (2018). Ensembl 2018. *Nucleic Acids Res.* *46*, D754–D761.
